# Supplementary material for: Quantitative detection of dithiocarbamate pesticides by surface-enhanced Raman spectroscopy combined with an exhaustive peak-seeking method
Source: Royal Society of Chemistry journal article supplement (doi:10.1039/d0ay01953d), 2021-01-01
Supplement: d0ay01953d1.pdf [file d0ay01953d1.pdf]

## Supporting Information

# Quantitative Detection of Dithiocarbamate Pesticides by Surface-Enhanced Raman Spectroscopy Combined with Exhaustive Peak-Seeking Method

Qiaoling Wei, Liangdong Zhang, Chunfeng Song\*, Hongfu Yuan\* and Xiaoyu Li

College of Materials Science and Engineering, Beijing University of Chemical Technology, 15, Beisanhuan Donglu, Chaoyang District, Beijing, 100029, China

\* Correspondence: cfsong@mail.buct.edu.cn (C. Song), hfyuan@mail.buct.edu.cn (H. Yuan).

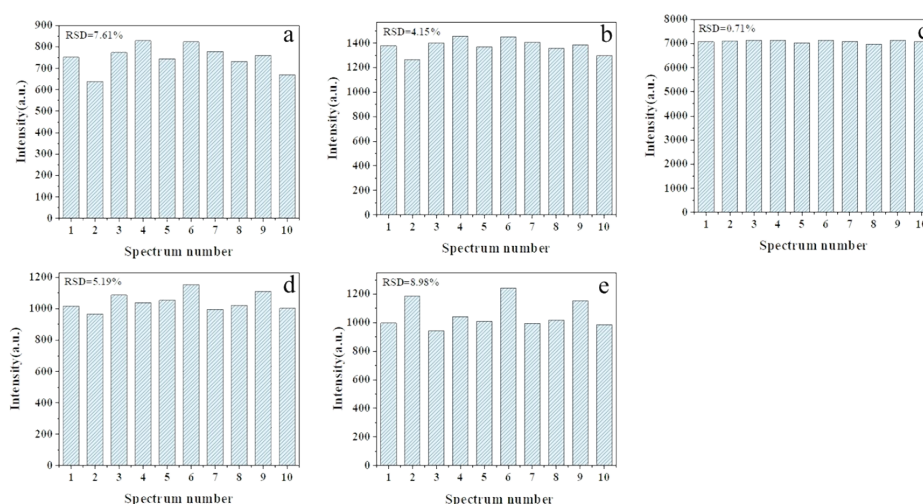

**Figure S1.** Calculated RSD of the peak intensity at 1384 cm<sup>-1</sup> of multiple collected the thiram SERS spectra of (a) 10<sup>2</sup> ppm, (b) 10 ppm, (c) 1 ppm, (d) 10<sup>-1</sup> ppm, and (e) 10<sup>-2</sup> ppm.

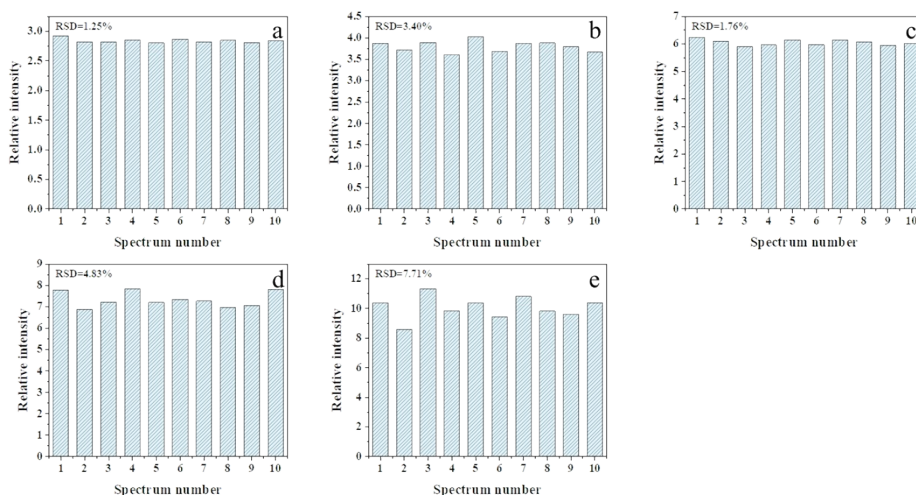

**Figure S2.** Calculated RSD of peak intensity ratio of  $1384\text{ cm}^{-1}/1148\text{ cm}^{-1}$  of multiple collected the thiram SERS spectra of (a)  $10^2$  ppm, (b) 10 ppm, (c) 1 ppm, (d)  $10^{-1}$  ppm, and (e)  $10^{-2}$  ppm.

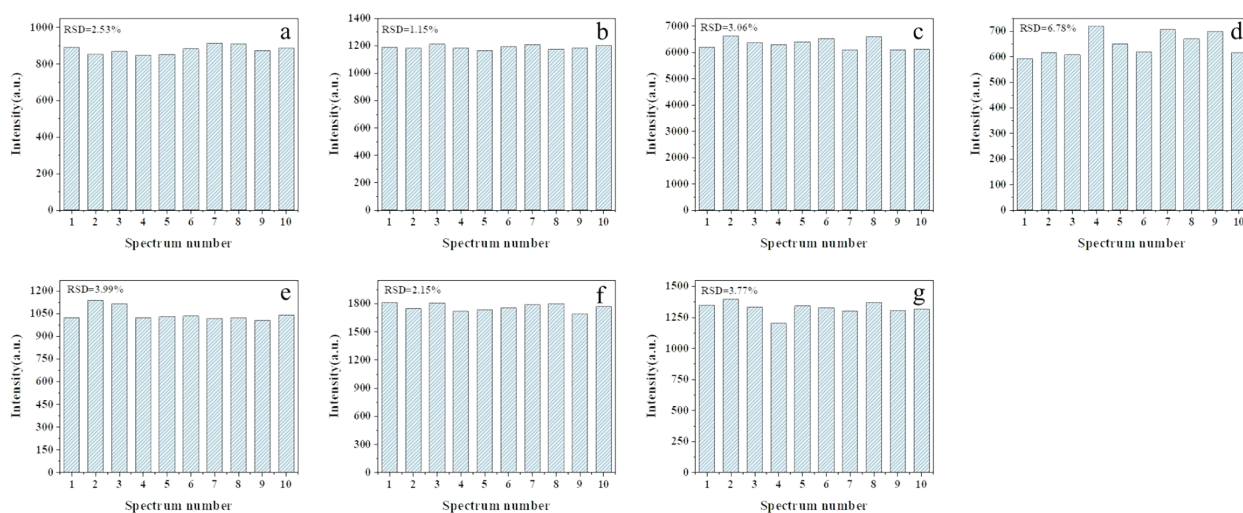

**Figure S3.** Calculated RSD of the peak intensity at  $1384\text{ cm}^{-1}$  of multiple collected the ziram SERS spectra of (a)  $10^2$  ppm, (b) 10 ppm, (c) 1 ppm, (d)  $10^{-1}$  ppm, (e)  $10^{-2}$  ppm, (f)  $10^{-3}$  ppm and (g)  $10^{-4}$  ppm.

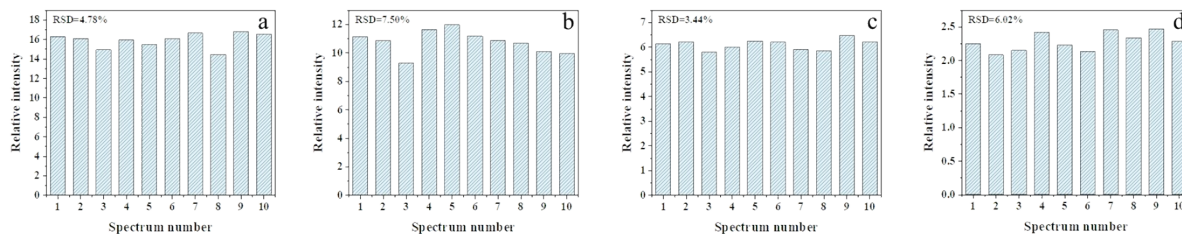

**Figure S4.** Calculated RSD of peak intensity ratio of  $1384\text{ cm}^{-1}/938\text{ cm}^{-1}$  of Multiple collected the thiram SERS spectra of (a)  $10^2$  ppm, (b) 10 ppm, (c) 1 ppm and (d)  $10^{-1}$  ppm.

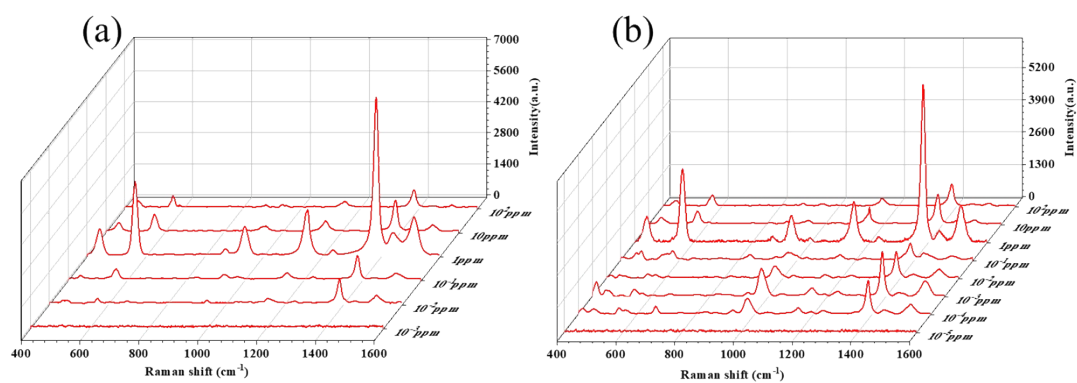

**Figure S5.** SERS spectra of aqueous solutions of (a)thiram and (b)ziram at different concentrations in Ag colloid-NaBr systems.

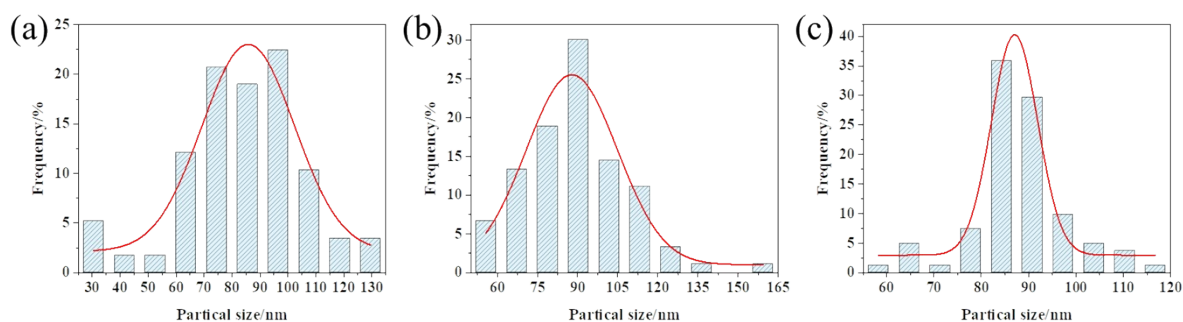

**Figure S6.** Particle size distribution of Ag NPs with different centrifuge conditions based on TEM images; (a)untreated Ag colloid; (b)just one-time centrifugation at 5000r/min for 5 min; (c)two times centrifugation at 3000r/min for 1 min and 5000 r/min for 5 min.

**Table S1.** Summary data of particle size distribution of Ag NPs with different centrifuge conditions based on TEM images.

| Centrifuge conditions          | $D_T$   | $PDI_T$ |
|--------------------------------|---------|---------|
| A: uncentrifuged               | 84.3083 | 1.16546 |
| B: 5000 rad/min                | 89.8121 | 1.14304 |
| C: 3000 rad/min + 5000 rad/min | 87.8099 | 1.0396  |

**Table S2.** Calculated RSD of the peak intensity at 1148 cm<sup>-1</sup> of multiple collected the thiram apple juice SERS spectra.

| C <sub>thiram</sub><br>/ppm | Intensity(a.u.) |        |        |         |        |        |        |        |         |        | RSD<br>/% |
|-----------------------------|-----------------|--------|--------|---------|--------|--------|--------|--------|---------|--------|-----------|
|                             | 1               | 2      | 3      | 4       | 5      | 6      | 7      | 8      | 9       | 10     |           |
| 75                          | 321.46          | 341.75 | 219.81 | 245.08  | 223.74 | 385.10 | 248.92 | 336.28 | 306.92  | 191.67 | 22.79     |
| 50                          | 331.58          | 278.82 | 300.97 | 195.39  | 216.97 | 166.21 | 261.44 | 238.97 | 299.94  | 228.93 | 20.64     |
| 25                          | 489.51          | 780.25 | 537.96 | 1001.83 | 725.97 | 687.10 | 661.80 | 517.49 | 745.75  | 650.49 | 22.16     |
| 10                          | 456.73          | 407.40 | 436.50 | 455.31  | 444.17 | 385.35 | 432.01 | 408.58 | 444.00  | 437.37 | 5.37      |
| 5                           | 540.32          | 538.01 | 521.21 | 540.72  | 526.54 | 550.45 | 537.56 | 585.46 | 533.92  | 526.76 | 3.34      |
| 1                           | 1001.23         | 981.42 | 969.29 | 980.96  | 921.02 | 963.04 | 966.66 | 955.66 | 1013.06 | 972.89 | 2.59      |
| 0.5                         | 372.02          | 399.40 | 423.32 | 336.20  | 364.48 | 342.92 | 327.23 | 330.17 | 403.09  | 388.42 | 9.24      |
| 0.1                         | 343.84          | 347.66 | 355.46 | 341.76  | 349.56 | 369.18 | 342.36 | 356.64 | 345.04  | 317.32 | 3.85      |
| 0.05                        | 265.48          | 240.01 | 274.01 | 272.41  | 287.62 | 264.19 | 278.77 | 261.44 | 299.84  | 243.29 | 6.82      |
| 0.02                        | 352.19          | 484.18 | 402.70 | 256.05  | 375.93 | 387.65 | 366.05 | 257.51 | 472.17  | 364.85 | 20.21     |

**Table S3.** Calculated RSD of the peak intensity at 938 cm<sup>-1</sup> of multiple collected the ziram apple juice SERS spectra.

| C <sub>thiram</sub><br>/ppm | Intensity(a.u.) |        |        |        |        |        |        |        |        |        | RSD<br>/% |
|-----------------------------|-----------------|--------|--------|--------|--------|--------|--------|--------|--------|--------|-----------|
|                             | 1               | 2      | 3      | 4      | 5      | 6      | 7      | 8      | 9      | 10     |           |
| 75                          | 132.11          | 203.22 | 182.93 | 136.79 | 168.05 | 138.18 | 135.91 | 101.19 | 123.28 | 150.59 | 20.37     |
| 50                          | 127.39          | 107.83 | 198.00 | 93.90  | 120.00 | 159.75 | 92.94  | 98.97  | 72.11  | 145.42 | 30.81     |
| 25                          | 108.30          | 125.89 | 103.97 | 171.42 | 132.07 | 123.08 | 120.45 | 158.23 | 113.50 | 65.57  | 23.84     |
| 10                          | 97.53           | 100.76 | 92.40  | 85.59  | 98.83  | 104.79 | 111.63 | 108.99 | 120.09 | 96.39  | 9.83      |
| 5                           | 133.45          | 143.84 | 142.26 | 126.32 | 139.03 | 143.22 | 144.04 | 144.71 | 133.64 | 137.31 | 4.38      |
| 1                           | 363.13          | 391.42 | 387.12 | 343.75 | 378.34 | 389.71 | 391.96 | 368.76 | 363.66 | 373.63 | 4.19      |
| 0.5                         | 209.14          | 200.63 | 204.75 | 202.74 | 206.35 | 201.63 | 203.65 | 204.66 | 217.28 | 214.45 | 2.67      |
| 0.1                         | 231.93          | 237.81 | 207.13 | 218.59 | 222.92 | 238.95 | 218.30 | 235.24 | 205.80 | 196.55 | 6.67      |
| 0.05                        | 223.35          | 219.49 | 220.11 | 217.54 | 227.42 | 218.43 | 209.71 | 212.62 | 218.89 | 207.52 | 2.79      |
